# Supplementary material
Source: publisher figshare collection journal article supplement (https://acs.figshare.com/ndownloader/files/5361092)
Supplement: Supplementary file 1 [file 5361092]

## SUPPORTING INFORMATION

# Atomic Force Microscopic Analysis of the Effect of Lipid Composition on Liposome Membrane Rigidity

*Yuki Takechi-Haraya<sup>†,‡</sup>, Kumiko Sakai-Kato<sup>†,\*</sup>, Yasuhiro Abe<sup>‡</sup>, Toru Kawanishi<sup>§</sup>, Haruhiro*

*Okuda<sup>§</sup>, Yukihiro Goda<sup>‡</sup>*

<sup>†</sup>Japan Agency for Medical Research and Development, 1-7-1 Otemachi, Chiyoda-ku,

Tokyo 100-0004, Japan

<sup>‡</sup>Division of Drugs, National Institute of Health Sciences, 1-18-1 Kamiyoga, Setagaya-ku,

Tokyo 158-8501, Japan

<sup>§</sup>National Institute of Health Sciences, 1-18-1 Kamiyoga, Setagaya-ku, Tokyo 158-8501,

Japan

\*To whom correspondence should be addressed:

Dr. Kumiko Sakai-Kato, PhD

Tel: +81-3-3700-9662

Fax: +81-3-3700-9662

E-mail: kumikato@nihs.go.jp

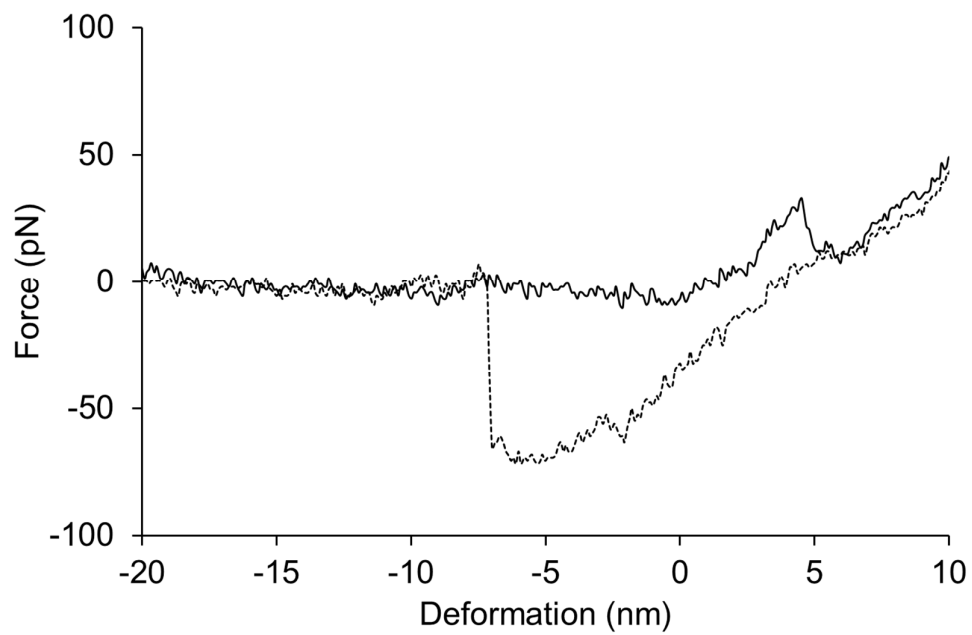

Figure S1. Hysteresis of force-deformation curves in high-deformation regime of EPC (100) liposome on a BSA-coated glass. Solid and dotted lines are approach and retraction curves, respectively.

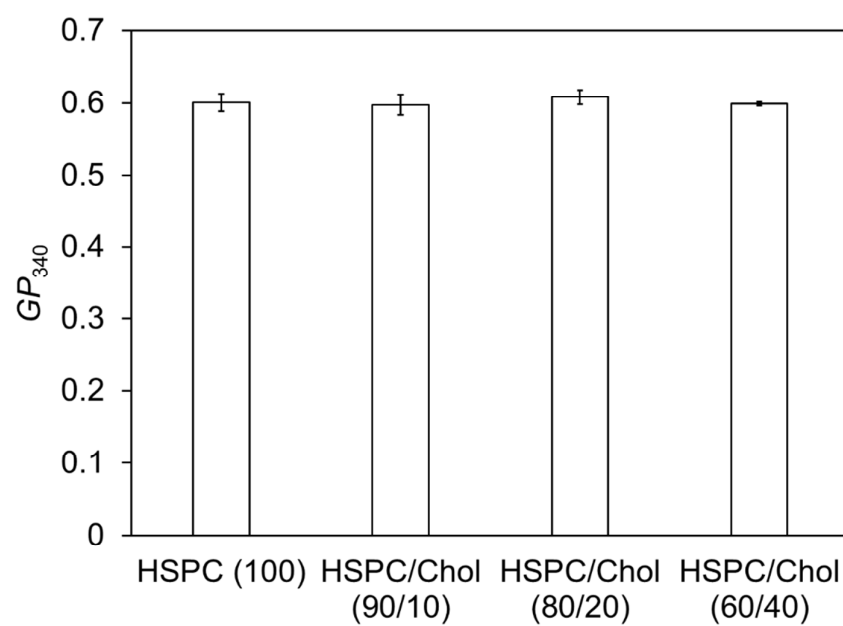

Figure S2.  $GP_{340}$  values of Laurdan in HSPC liposomes containing different amounts of Chol.

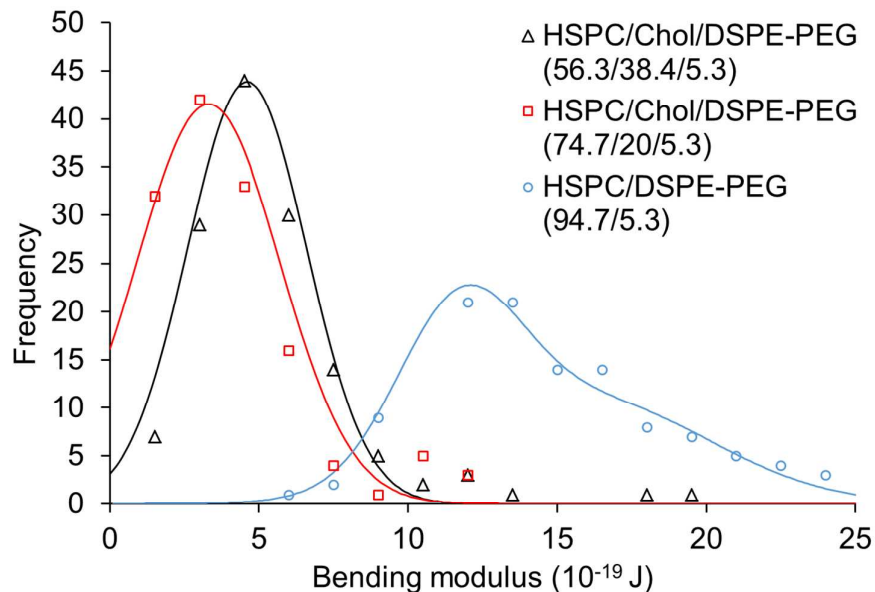

Figure S3. Distributions of bending modulus measured on HSPC/DSPE-PEG (94.7/5.3), HSPC/Chol/DSPE-PEG (74.7/20/5.3) and HSPC/Chol/DSPE-PEG (56.3/38.4/5.3) liposomes. The experimental data of HSPC/Chol/DSPE-PEG (74.7/20/5.3) and HSPC/Chol/DSPE-PEG (56.3/38.4/5.3), respectively, was fitted using one Gaussian distribution. The data of HSPC/DSPE-PEG (94.7/5.3) was fitted using two Gaussian distribution. Because high concentrations of DSPE-PEG (>20 mol%) induce the structural transition of HSPC liposomes (0% Chol) into small discoidal micelles (*Biophys. J.* **2003**, 85, 3839), the two Gaussian distributions might indicate the presence of destabilized HSPC/DSPE-PEG (94.7/5.3) liposomes, the lipid packing of which is disturbed by PEGylation.
